# Supplementary material for: Brownmillerites CaFeO2.5 and SrFeO2.5 as Catalyst Support for CO Oxidation
Source: MDPI journal article supplement (doi:10.3390/molecules26216413), 2021-10-23
Supplement: s1 [file s1]

# Supporting Information

## For

### Brownmillerites $\text{CaFeO}_{2.5}$ and $\text{SrFeO}_{2.5}$ as catalyst support for CO oxidation

Pierre-Alexis Répécaud<sup>1,2</sup>, Monica Ceretti<sup>2</sup>, Mimoun Aouine<sup>3</sup>, Céline Delwaulle<sup>4</sup>, Emmanuel Nonnet<sup>4</sup>  
Werner Paulus<sup>2\*</sup> and Helena Kaper<sup>1\*</sup>

<sup>1</sup> Laboratoire de Synthèse et Fonctionnalisation des Céramiques, CNRS/Saint-Gobain CREE, Saint-Gobain Research Provence, 550, Ave Alphonse Jauffret, 84306 Cavaillon, France;

<sup>2</sup> ICGM, University Montpellier, CNRS, ENSCM-34095, Montpellier, France;

<sup>3</sup> Université de Lyon, Université Claude Bernard Lyon, CNRS, IRCELYON, 2 av Albert Einstein, 69626 Villeurbanne, France;

<sup>4</sup> Competency Research Laboratory, Saint-Gobain Research Provence, 550, Ave Alphonse Jauffret, 84306 Cavaillon, France;

\* Correspondence: H.K.: [helena.kaper@saint-gobain.com](mailto:helena.kaper@saint-gobain.com); W.P.: [werner.paulus@univ-montp2.fr](mailto:werner.paulus@univ-montp2.fr)

Table S1. Physicochemical properties of CFO\_cp, CFO\_eaf, SFO\_cp and SFO\_eaf.

|                                           | CFO_cp | CFO_eaf | SFO_cp | SFO_eaf |
|-------------------------------------------|--------|---------|--------|---------|
| Specific surface area (m <sup>2</sup> /g) | 12     | <1      | 13     | <1      |
| Ca:Fe ratio                               | 0.95   | 1.06    |        |         |
| Sr:Fe ratio                               |        |         | 0.99   | 1.05    |

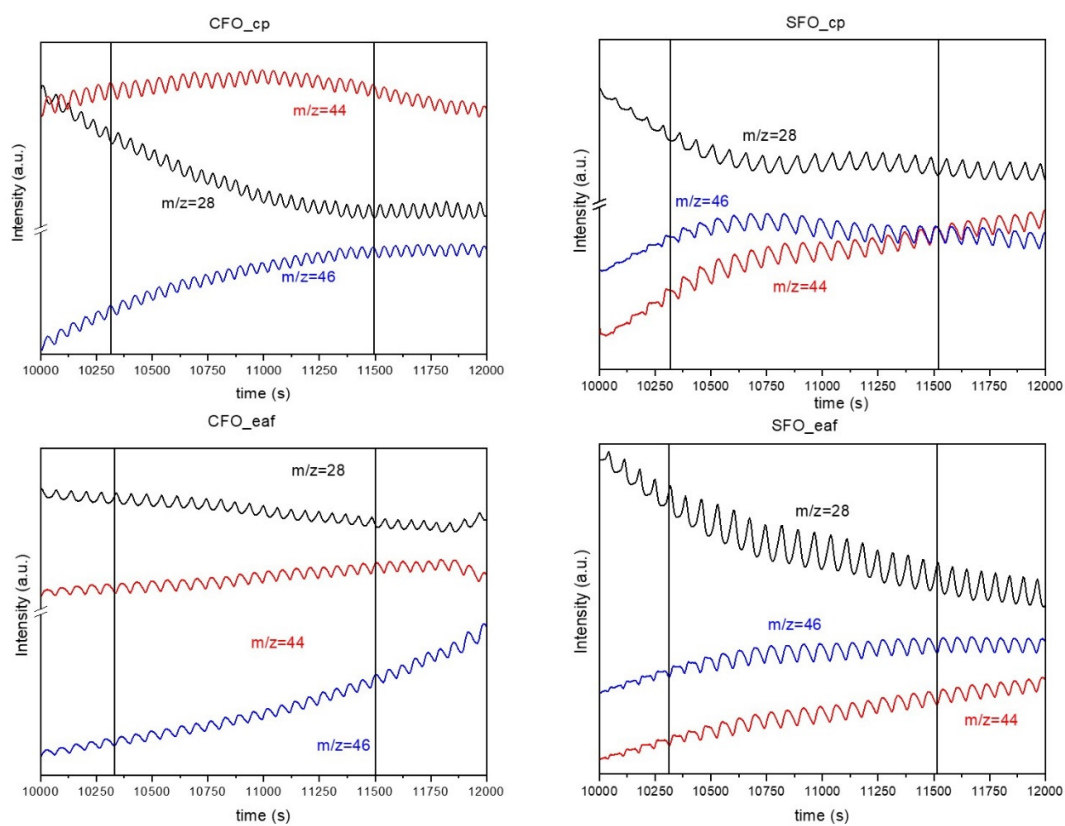

Figure S1. Comparison of oscillation during CO-oxidation on  $^{18}\text{O}$ -exchanged materials. Upper left: CFO\_cp, upper right: SFO\_cp, lower left: CFO\_eaf, lower right: SFO\_eaf.

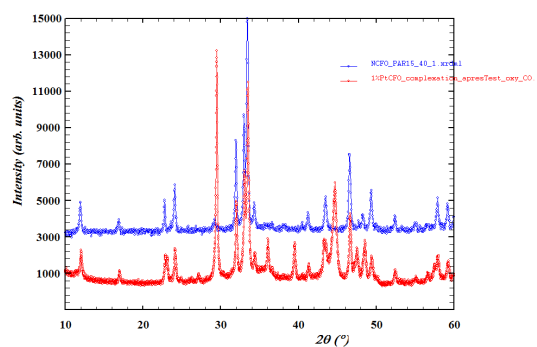

A

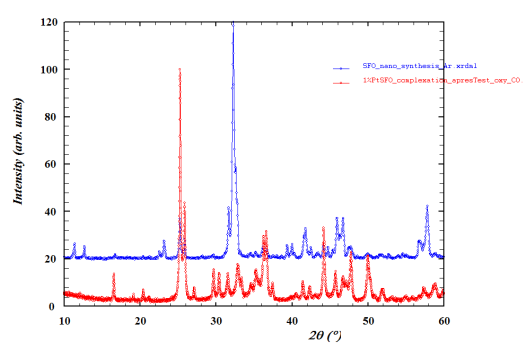

B

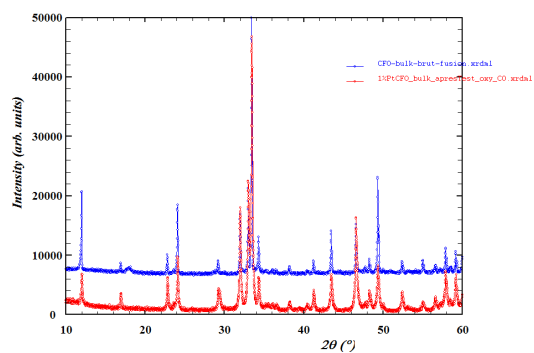

C

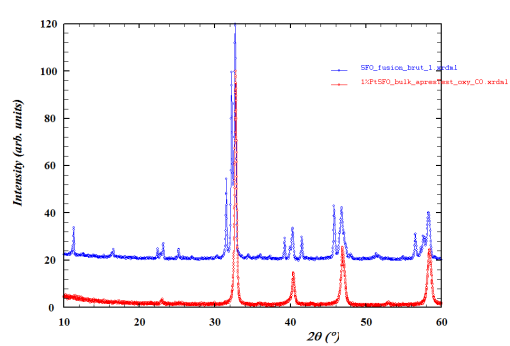

D
